# Supplementary material
Source: PubMed Central journal article supplement (PMC4056646)
Supplement: jn.113.187732_nutrition187732SupplementaryData1.pdf [file jn.113.187732_nutrition187732SupplementaryData1.pdf]

## Online Supporting Material

Supplemental Table 1. Composition of Harlan Teklad iron control (TD.05656) and iron-deficient (TD.80396) purified diets fed to rats.

| Ingredient                                      | Diet        |                |
|-------------------------------------------------|-------------|----------------|
|                                                 | Control     | Iron-Deficient |
|                                                 | <i>g/kg</i> |                |
| Casein, low Cu & Fe                             | 200         | 200            |
| DL-Methionine                                   | 3.0         | 3.0            |
| Sucrose                                         | 549         | 550            |
| Corn Starch                                     | 150         | 150            |
| Corn Oil                                        | 50.0        | 50.0           |
| Mineral Mix <sup>2</sup> , Fe deficient (81062) | 35.0        | 35.0           |
| Vitamin Mix <sup>3</sup> , AIN-76A (40077)      | 10.0        | 10.0           |
| Ferric Citrate <sup>1</sup>                     | 1.4         | -              |
| Choline Bitartate                               | 2.0         | 2.0            |
| Ethoxyquin                                      | 0.01        | 0.01           |

<sup>1</sup> The iron-deficient and sufficient (control) diets contained on average 2- 6 and 240 µg Fe/g diet, respectively.

<sup>2</sup> Vitamin mix contained the following (g/kg mix): thiamin HCl, 0.60; riboflavin, 0.60; pyridoxine HCl, 0.70; niacin, 3.0; calcium pantothenate, 1.60; folic acid, 0.20; biotin, 0.02; vitamin B12, 1.0; dry vitamin A palmitate (500 kIU/g), 0.80; dry vitamin E acetate (500 IU/g), 10.0; vitamin D3 trituration (400 kIU/g), 0.30; menadione sodium bisulfite, 0.20; sucrose, 981.

<sup>3</sup> Mineral mix contained the following (g/kg mix): CaHPO<sub>4</sub>, 500; NaCl, 74.0; C<sub>6</sub>H<sub>7</sub>K<sub>3</sub>O<sub>8</sub>, 220; K<sub>2</sub>SO<sub>4</sub>, 52.0; MgO, 24.0; MnCO<sub>3</sub>, 3.5; ZnCO<sub>3</sub>, 1.6; CuCO<sub>3</sub>, 0.3; KIO<sub>3</sub>, 0.01; Na<sub>2</sub>SeO<sub>3</sub> · 5H<sub>2</sub>O, 0.01; KCrS<sub>2</sub>O<sub>8</sub>, 0.6; sucrose 124.

## Online Supporting Material

Supplemental Table 2. Structural characteristics of CC axons from P40 iron-deficient (Fe-) and control (Fe+) rats<sup>1,2</sup>

|                           | Fe +        | Fe -        | <i>P</i> -values |
|---------------------------|-------------|-------------|------------------|
| N                         | 3           | 3           |                  |
| Myelination, %            | 92.9 ± 3.3  | 91.6 ± 4.2  | 0.69             |
| Myelin Thickness, $\mu m$ | 0.08 ± 0.01 | 0.08 ± 0.02 | 1.00             |
| Axon Density <sup>3</sup> | 142 ± 14.1  | 125 ± 25.3  | 0.36             |
| G-Ratio <sup>4</sup>      | 0.80 ± 0.06 | 0.77 ± 0.02 | 0.49             |
| Lamella, #                | 8.21 ± 2.08 | 7.33 ± 2.01 | 0.32             |

<sup>1</sup> Results given as mean ± SEM, data represents 3 litters per diet group, with N representing number of offspring used per diet group.

<sup>2</sup> Abbreviations used: Fe -, offspring of dams fed iron-deficient diet; Fe +, offspring of dams fed iron-sufficient diet

<sup>3</sup> Axon density = axons/100  $\mu m^2$ .

<sup>4</sup> G-ratio = myelinated fiber diameter/axon diameter.
